# Supplementary material for: Polysymptomatology in Pediatric Patients Receiving Palliative Care Based on Parent-Reported Data
Source: PubMed Central journal article supplement (PMC8343495; doi:10.1001/jamanetworkopen.2021.19730), 2021-08-05
Supplement: jamanetwopen-e2119730-s002.pdf [file jamanetwopen-e2119730-s002.pdf]

\*Indicates required information. Only first name, last name, and suffix will appear in PubMed.

| <b>*Group Name(s): PPCRN SHARE Project Group</b> |                   |                              |                  |                                              |                                          |                                                         |                                                                                            |
|--------------------------------------------------|-------------------|------------------------------|------------------|----------------------------------------------|------------------------------------------|---------------------------------------------------------|--------------------------------------------------------------------------------------------|
| <b>*First Name and Middle Initial(s)</b>         | <b>*Last Name</b> | <b>*Suffix (eg, Jr, III)</b> | Academic Degrees | Institution                                  | Location (city, state/province, country) | Role or Contribution, eg, chair, principal investigator | Group (if more than 1 Group listed in the byline) and/or Subgroup (eg, Steering Committee) |
| Karen                                            | Crew              |                              | BS               | Children's Hospital of Philadelphia          | Philadelphia, PA, USA                    | Project coordinator                                     | PPCRN SHARE Project Group                                                                  |
| Hannah                                           | Katcoff           |                              | MPH              | Children's Hospital of Philadelphia          | Philadelphia, PA, USA                    | Database design/mgm                                     | PPCRN SHARE Project Group                                                                  |
| Heather                                          | Griffis           |                              | PhD              | Children's Hospital of Philadelphia          | Philadelphia, PA, USA                    | Database design/mgm                                     | PPCRN SHARE Project Group                                                                  |
| Rae                                              | Xiao              |                              | PhD              | Children's Hospital of Philadelphia          | Philadelphia, PA, USA                    | Statistical analysis                                    | PPCRN SHARE Project Group                                                                  |
| Kris                                             | Catrine           |                              | MD               | Children's Hospitals and Clinics of Minnesot | Minneapolis, MN, USA                     | Site PI                                                 | PPCRN SHARE Project Group                                                                  |
| Tatiana                                          | Arevalo-Soriano   |                              | BS               | Texas Children's Hospital                    | Houston, TX, USA                         | Site coordinator                                        | PPCRN SHARE Project Group                                                                  |
| Leah                                             | Beight            |                              | MPH              | DFCI/Children's Hospital Boston              | Boston, MA, USA                          | Site coordinator                                        | PPCRN SHARE Project Group                                                                  |
| Madeline                                         | Bilodeau          |                              | MPH              | DFCI/Children's Hospital Boston              | Boston, MA, USA                          | Site coordinator                                        | PPCRN SHARE Project Group                                                                  |
| Jennifer                                         | Chapman           |                              | MPH              | Children's Hospital of Philadelphia          | Philadelphia, PA, USA                    | Site coordinator                                        | PPCRN SHARE Project Group                                                                  |
| Porag                                            | Das               |                              | BS               | DFCI/Children's Hospital Boston              | Boston, MA, USA                          | Site coordinator                                        | PPCRN SHARE Project Group                                                                  |
| Gabrielle                                        | Helton            |                              | BA               | DFCI/Children's Hospital Boston              | Boston, MA, USA                          | Site coordinator                                        | PPCRN SHARE Project Group                                                                  |
| Rachel                                           | Jenkins           |                              | MA               | Akron Children's Hospital                    | Akron, OH, USA                           | Site coordinator                                        | PPCRN SHARE Project Group                                                                  |
| Ali                                              | Kolste            |                              | MS               | Children's Hospitals and Clinics of Minnesot | Minneapolis, MN, USA                     | Site coordinator                                        | PPCRN SHARE Project Group                                                                  |
| Deborah                                          | Maglionico        |                              | MS               | Akron Children's Hospital                    | Akron, OH, USA                           | Site coordinator                                        | PPCRN SHARE Project Group                                                                  |
| Isaac                                            | Martinez          |                              | BA               | Children's of Alabama                        | Birmingham, AL, USA                      | Site coordinator                                        | PPCRN SHARE Project Group                                                                  |
| Amanda                                           | Mercer            |                              | BA               | Seattle Children's Hospital                  | Seattle, WA, USA                         | Site coordinator                                        | PPCRN SHARE Project Group                                                                  |
| Ashley                                           | Morris            |                              | BS               | Akron Children's Hospital                    | Akron, OH, USA                           | Site coordinator                                        | PPCRN SHARE Project Group                                                                  |

## Supplemental Online Content: Nonauthor Collaborators

\*Indicates required information. Only first name, last name, and suffix will appear in PubMed.

| *First Name and Middle Initial(s) | *Last Name     | *Suffix (eg, Jr, III) | Academic Degrees | Institution                     | Location (city, state/province, country) | Role or Contribution, eg, chair, principal investigator | Group (if more than 1 Group listed in the byline) and/or Subgroup (eg, Steering Committee) |
|-----------------------------------|----------------|-----------------------|------------------|---------------------------------|------------------------------------------|---------------------------------------------------------|--------------------------------------------------------------------------------------------|
| Shimei                            | Nelapati       |                       | BS               | Texas Children's Hospital       | Houston, TX, USA                         | Site coordinator                                        | PPCRN SHARE Project Group                                                                  |
| Rachel                            | Porth          |                       | BA               | DFCI/Children's Hospital Boston | Boston, MA, USA                          | Site coordinator                                        | PPCRN SHARE Project Group                                                                  |
| Nicole                            | Etsekson Sherr |                       | MPH              | Seattle Children's Hospital     | Seattle, WA, USA                         | Site coordinator                                        | PPCRN SHARE Project Group                                                                  |
| Kelly                             | Shipman        |                       | MS               | Seattle Children's Hospital     | Seattle, WA, USA                         | Site coordinator                                        | PPCRN SHARE Project Group                                                                  |
| Namrata                           | Walia          |                       | MD               | Texas Children's Hospital       | Houston, TX, USA                         | Site coordinator                                        | PPCRN SHARE Project Group                                                                  |
